# Supplementary material for: The Role of Mycorrhizal-Assisted Phytomining in the Recovery of Raw Materials from Mine Wastes
Source: MDPI journal article supplement (doi:10.3390/met12111828), 2022-10-27
Supplement: s1 [file s1]

## Article

# The Role of Mycorrhizal-Assisted Phytomining in the Recovery of Raw Materials from Mine Wastes

Adalgisa Scotti <sup>1,2,\*</sup>, Vanesa Analía Silvani <sup>3,†</sup>, Natalia Andrea Juarez <sup>1</sup>, Alicia Margarita Godeas <sup>3</sup> and Stefano Ubaldini <sup>2</sup>

<sup>1</sup> Bioenvironmental Laboratory, International Center for Earth Sciences, National Atomic Energy Commission, Technological University National-FRSR, San Rafael Mendoza 5600, Argentina

<sup>2</sup> Institute of Environmental Geology and Geoengineering, National Research Council of Italy, Research Area of Rome 1, 00015 Montelibretti, Italy

<sup>3</sup> Institute of Biodiversity and Applied and Experimental Biology, Faculty of Exact and Natural Science, National Scientific and Technical Research Council—University of Buenos Aires, Buenos Aires 1428, Argentina

\* Correspondence: scotti@cnea.gov.ar

† These authors contributed equally to this work.

**Table S1.** Additional information about sampling sites (Source Verónica Saavedra, Universidad Nacional de San Luis, Horizon 2020 ERA MIN BioCriticalMetals project).

| Sample (ID) | Site              | Sector                 | Geographical coordinates                                 | Depth (m) |
|-------------|-------------------|------------------------|----------------------------------------------------------|-----------|
| DA-04       | Los Cóndores mine | Mining dam: Dique Alto | 32°34'34,8" South latitude<br>65°19'17,3" West Longitude | 1         |
| DB-05       | Los Cóndores mine | Mining dam: Dique Bajo | 32°34'35,8" South Latitude<br>65°19'21,6" West Longitude | 1         |
| EA-06       | Los Cóndores mine | Mine dump              | 32°34'27,6" South Latitude<br>65°19'23,7" West Longitude | 0.6       |
| EA-07       | Los Cóndores mine | Mine dump              | 32°34'27,7" South Latitude<br>65°19'22,6" West Longitude | 1         |
